# Fast, sensitive, and accurate integration of single cell data with Harmony

Ilya Korsunsky<sup>1234</sup>, Jean Fan<sup>5</sup>, Kamil Slowikowski<sup>123</sup>, Fan Zhang<sup>1234</sup>, Kevin Wei<sup>2</sup>, Yuriy Baglaenko<sup>1234</sup>, Michael Brenner<sup>2</sup>, Po-Ru Loh<sup>134</sup>, Soumya Raychaudhuri<sup>12346</sup>

<sup>1</sup>Center for Data Sciences, Brigham and Women's Hospital, Massachusetts, USA. <sup>2</sup>Divisions of Genetics and Rheumatology, Department of Medicine, Brigham and Women's Hospital and Harvard Medical School, Boston, <sup>3</sup>Department of Biomedical Informatics, Harvard Medical School, Massachusetts, USA. <sup>4</sup>Program in Medical and Population Genetics, Broad Institute of MIT and Harvard, Cambridge, MA, USA. <sup>5</sup>Department of Chemistry and Chemical Biology, Harvard University, Cambridge, Massachusetts, USA. <sup>6</sup>Arthritis Research UK Centre for Genetics and Genomics, Centre for Musculoskeletal Research, Manchester Academic Health Science Centre, The University of Manchester, Manchester, UK.

\* Correspondence to:

Soumya Raychaudhuri

77 Avenue Louis Pasteur, Harvard New Research Building, Suite 250D

Boston, MA 02446, USA.

soumya@broadinstitute.org; 617-525-4484 (tel); 617-525-4488 (fax)

1 **Abstract.** The rapidly emerging diversity of single cell RNAseq datasets allows us to characterize the transcriptional behav-  
2 ior of cell types across a wide variety of biological and clinical conditions. With this comprehensive breadth comes a major  
3 analytical challenge. The same cell type across tissues, from different donors, or in different disease states, may appear  
4 to express different genes. A joint analysis of multiple datasets requires the integration of cells across diverse conditions.  
5 This is particularly challenging when datasets are assayed with different technologies in which real biological differences  
6 are interspersed with technical differences. We present Harmony, an algorithm that projects cells into a shared embedding  
7 in which cells group by cell type rather than dataset-specific conditions. Unlike available single-cell integration methods,  
8 Harmony can simultaneously account for multiple experimental and biological factors. We develop objective metrics to  
9 evaluate the quality of data integration. In four separate analyses, we demonstrate the superior performance of Harmony to  
10 four single-cell-specific integration algorithms. Moreover, we show that Harmony requires dramatically fewer computational  
11 resources. It is the only available algorithm that makes the integration of  $\sim 10^6$  cells feasible on a personal computer. We  
12 demonstrate that Harmony identifies both broad populations and fine-grained subpopulations of PBMCs from datasets with  
13 large experimental differences. In a meta-analysis of 14,746 cells from 5 studies of human pancreatic islet cells, Harmony  
14 accounts for variation among technologies and donors to successfully align several rare subpopulations. In the resulting in-  
15 tegrated embedding, we identify a previously unidentified population of potentially dysfunctional alpha islet cells, enriched  
16 for genes active in the Endoplasmic Reticulum (ER) stress response. The abundance of these alpha cells correlates across  
17 donors with the proportion of dysfunctional beta cells also enriched in ER stress response genes. Harmony is a fast and  
18 flexible general purpose integration algorithm that enables the identification of shared fine-grained subpopulations across a  
19 variety of experimental and biological conditions.

20 Recent technological advances<sup>1</sup> have enabled unbiased single cell transcriptional profiling of thousands of cells in a  
21 single experiment. Projects such as the Human Cell Atlas<sup>2</sup> (HCA) and Accelerating Medicines Partnership<sup>3,4</sup> exemplify  
22 the growing body of reference datasets of primary human tissues. While individual experiments contribute incrementally  
23 to our understanding of cell types, a comprehensive catalogue of healthy and diseased cells will require the integration of  
24 multiple datasets across donors, studies, and technological platforms. Moreover, in translational research, joint analyses  
25 across tissues and clinical conditions will be essential to identify disease expanded populations. However, meaningful  
26 biological variation in single cell RNA-seq datasets from different studies is often hopelessly confounded by data source.<sup>5</sup>  
27 Recognizing this key issue, investigators have developed unsupervised multi-dataset integration algorithms, such as Seurat  
28 MultiCCA,<sup>6</sup> MNN Correct,<sup>7</sup> Scanorama,<sup>8</sup> and BBKNN<sup>9</sup> to enable joint analysis. These methods embed cells from diverse  
29 experimental conditions and biological contexts into a common reduced dimensional embedding to enable shared cell type  
30 identification across datasets.

31 Here we introduce Harmony, an algorithm for robust, scalable, and flexible multi-dataset integration that addresses, to  
32 meet three key challenges of unsupervised scRNAseq joint embedding. First, cell types with regulatory or pathogenic roles  
33 are often rare, with subtle transcriptomic signatures. Integration must be able to identify both common and rare cell types,  
34 particularly those whose subtle signatures are initially obscured by technical or biological confounders. To be sensitive to  
35 subpopulations with subtle signatures, Harmony uses a two-step iterative strategy that removes the effect of such confounding  
36 factors at each round. This makes it easier to identify shared cell types whose expression signatures were obscured in the  
37 original data. Second, the number of cells in experiments is quickly expanding, exceeding 100,000 cells in atlas-like datasets.  
38 Integration algorithms must scale computationally, both in terms of runtime and required memory resources. To scale to big  
39 data, Harmony uses linear methods and avoids the costly cell-to-cell comparisons that scale quadratically with the number  
40 of cells. Third, more complex experimental design of single cell analysis compares cells from different donors, tissues, and  
41 technological platforms. In order for the joint embedding to be free of the influence of each, integration must simultaneously  
42 account for multiple sources of variation. The Harmony simultaneously accounts for multiple sources of variation, because  
43 the clustering objective function is formulated to account for any number of categorical covariates. Harmony is available as  
44 an R package on github (<https://github.com/immunogenomics/harmony>), with functions for standalone and Seurat6 pipeline  
45 analyses.

46 Here, we demonstrate how Harmony address the three unmet needs outlined above. First, we give an overview of the  
47 Harmony algorithm. Then, we integrate carefully designed cell line datasets to introduce metrics for quantifying cell-type  
48 accuracy and degree of dataset-mixing before and after integration. All measures of cell-type accuracy are based on anno-  
49 tation within datasets separately. As Harmony does not use cell-type information to integrate cells, these labels provide an  
50 unbiased quantification of accuracy. We then demonstrate that Harmony generates embeddings with higher quality and fewer  
51 computational resources than all currently available algorithms by testing each of them across a wide range of dataset sizes,  
52 from 25,000 to 500,000 total cells. Next, we show that Harmony to identify both broad populations and fine-grained sub-

53 populations of cells in three datasets of peripheral blood mononuclear cell (PBMC) datasets with large technical differences.  
54 Finally, in a pancreatic islet cell meta-analysis, we demonstrate the power of Harmony to simultaneously integrate donor-  
55 and technology-specific effects to identify several rare subpopulations, including one putative novel islet cell subtype.

## 56 **Results**

### 57 **Harmony Iteratively Learns a Cell-Specific Linear Correction Function**

58 Starting with a PCA embedding, Harmony first groups cells into multi-dataset clusters (**Figure 1A**). We use soft clustering,  
59 assigning cells to potentially multiple clusters, to account for smooth transitions between cell states. In our thinking, these  
60 clusters serve as surrogate variables, rather than actually defining discrete cell-types. We developed a novel variant of soft  
61 k-means clustering to favor clusters with representation across multiple datasets (Online Methods). Clusters containing  
62 cells that are disproportionately represented by a small subset of datasets are penalized by an information theoretic metric.  
63 Harmony allows the user to apply multiple different penalties to accommodate multiple technical or biological factors, such  
64 as different batches and different technology platforms. The uncertainty encoded in the soft clustering preserves discrete  
65 and continuous topologies while avoiding local minima that might result from too quickly maximizing representation across  
66 multiple datasets, and preserves uncertainty. After clustering, each dataset has a cluster-specific centroid (**Figure 1B**) that is  
67 used to compute cluster-specific linear correction factors (**Figure 1C**). Under favorable conditions, the surrogate variables,  
68 defined by cluster membership, correspond to cell types and cell states. Thus, the cluster-specific correction factors that  
69 Harmony computes correspond to individual cell-type and cell-state specific correction factors. In this way, Harmony learns  
70 a simple linear adjustment function that is sensitive to intrinsic cellular phenotypes. Finally, each cell is assigned a cluster-  
71 weighted average of these terms and corrected by its cell-specific linear factor (**Figure 1D**). As a result, each cell has a  
72 potentially unique correction factor, depending on its soft clustering distribution. Harmony iterates these four steps until  
73 convergence. At convergence, additional iterations would assign cells to the same clusters and compute the same linear  
74 correction factors.



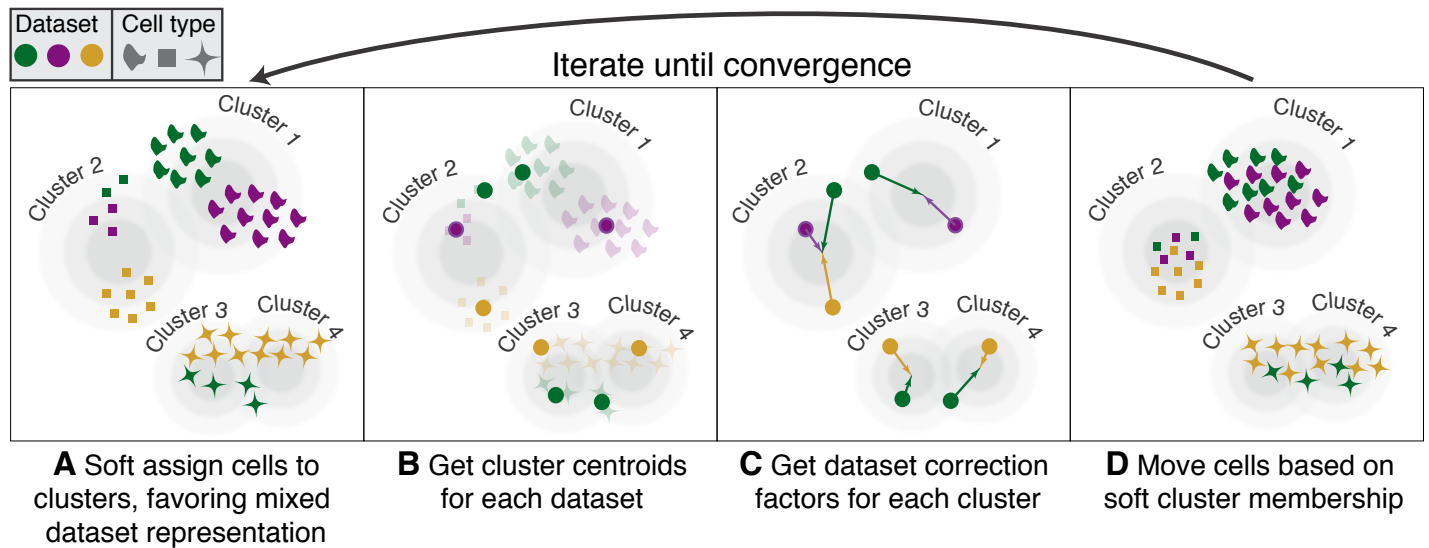

**Figure 1:** Overview of Harmony algorithm. We represent datasets with colors, and different cell types with shapes. Before we apply Harmony, principal components analysis embeds cells into a space with reduced dimensionality. Harmony accepts the cell coordinates in this reduced space and runs an iterative algorithm to adjust for data set specific effects. (A) Harmony uses fuzzy clustering to assign each cell to multiple clusters, while a penalty term ensures that the diversity of datasets within each cluster is maximized. (B) Harmony calculates a global centroid for each cluster, as well as dataset-specific centroids for each cluster. (C) Within each cluster, Harmony calculates a correction factor for each dataset based on the centroids. (D) Finally, Harmony corrects each cell with a cell-specific factor: a linear combination of dataset correction factors weighted by its soft cluster assignments made in step A. Harmony repeats steps A through D until convergence. The dependence between cluster assignment and dataset diminishes with each round.

## 75 Quantification of Error and Accuracy in Cell Line Integration

76 We first assessed Harmony using three carefully controlled datasets, in order to evaluate performance on both integration  
 77 (mixing of datasets) and accuracy (no mixing of cell types). Both metrics are important. Perfect integration can be achieved  
 78 by simply mixing all cells, regardless of cellular identity. Similarly, high accuracy can be achieved by partitioning cell types  
 79 into broad clusters without mixing datasets in small neighborhoods. In this situation, broad cellular states are defined, but  
 80 fine-grained cellular substates and subtypes are confounded by the originating dataset. In order to quantify integration and  
 81 accuracy of this embedding we felt that it was important that we have an objective metric. To this end, we compute the Local  
 82 Inverse Simpson's Index (LISI, Online Methods) in the local neighborhood of each cell. To assess integration, we employ  
 83 integration LISI (iLISI, **Figure 2A**), denotes the effective number of datasets in a neighborhood. Neighborhoods represented  
 84 by only a single dataset get an iLISI of 1, while neighborhoods with an equal number of cells from 2 datasets get an iLISI  
 85 of 2. Note that even under ideal mixing, if the datasets have different numbers of cells, iLISI would be less than 2. To  
 86 assess accuracy, we use cell-type LISI (cLISI, **Figure 2B**), the same mathematical measure, but applied to cell-type instead  
 87 of dataset labels. Accurate integration should maintain a cLISI of 1, reflecting a separation of unique cell types throughout  
 88 the embedding. An erroneous embedding would include neighborhoods with a cLISI of 2, indicating that neighbors have 2  
 89 different types of cells.

90 We begin with three datasets from two cells lines: (1) pure Jurkat, (2) pure 293T and (3) a 50:50 mix.<sup>10</sup> These datasets  
91 are particularly ideal for illustration and for assessment, as each cell can be unambiguously labeled Jurkat or 293T (**Figure**  
92 **S1**). A thorough integration would mix the 1799 Jurkat cells from the mixture dataset with 3255 cells from the pure Jurkat  
93 dataset and the 1565 293T cells from the mixture dataset with the 2859 from the pure 293T dataset. Thus, we expect the  
94 average iLISI to range from 1, reflecting no integration, to 1.8 for Jurkat cells and 1.5 for 293T cells<sup>1</sup>, reflecting maximal  
95 accurate integration. Application of a standard PCA pipeline followed by UMAP embedding demonstrates that the cells  
96 group broadly by dataset and cell type. This is both visually apparent (**Figure 2C,D**) and quantified (**Figure 2E,F**) with  
97 high accuracy reflected by a low cLISI (median iLISI 1.00, 95% [1.00, 1.00]). However the iLISI (median iLISI 1.01, 95%  
98 [1.00, 1.61]) is also low, reflecting imperfect integration, and ample structure within each cell-type reflecting the data set  
99 of origin. After Harmony, cells from the 50:50 dataset are mixed into the pure datasets (**Figure 2E**), which is appropriate  
100 in this case since these cell-lines have no additional biological structure. The increased iLISI (**Figure 2D**, median iLISI  
101 1.59, 95% [1.27, 1.97]) reflects the mixing of datasets, while the low cLISI (median iLISI 1.00, 95% [1.00, 1.02]) reflects  
102 the accurate separation of Jurkat from 293T cells. iLISI and cLISI provide a quantitative way to assess the integration and  
103 accuracy of multiple algorithms. We repeated the integration and LISI analyses with MNN Correct, BBKNN, MultiCCA,  
104 and Scanorama (**Figure 2G**). While Harmony had the highest iLISI, Scanorama MNN Correct, and BBKNN provided lower  
105 levels of integration, evidence by lower iLISI. MultiCCA actually separated previously mixed datasets, yielding a lower iLISI  
106 (median 1.00, 95% [1.00, 1.28]) than before integration. Except for MultiCCA (median cLISI 1.00, 95% [1.00, 1.23]), the  
107 other algorithms maintained high accuracy (**Table S1**, median cLISI 1.00, 95% [1.00, 1.00]). This benchmark demonstrates  
108 the two key metrics for assessing mixing and accuracy and shows that Harmony performs well on both metrics in a well-  
109 controlled analysis of cell-line datasets.

---

<sup>1</sup>  $1.5 = 1 / [(1565 / (1565 + 2859))^2 + (2859 / (1565 + 2859))^2]$ ,  $1.8 = 1 / [(1799 / (1799 + 2859))^2 + (3255 / (1799 + 3255))^2]$

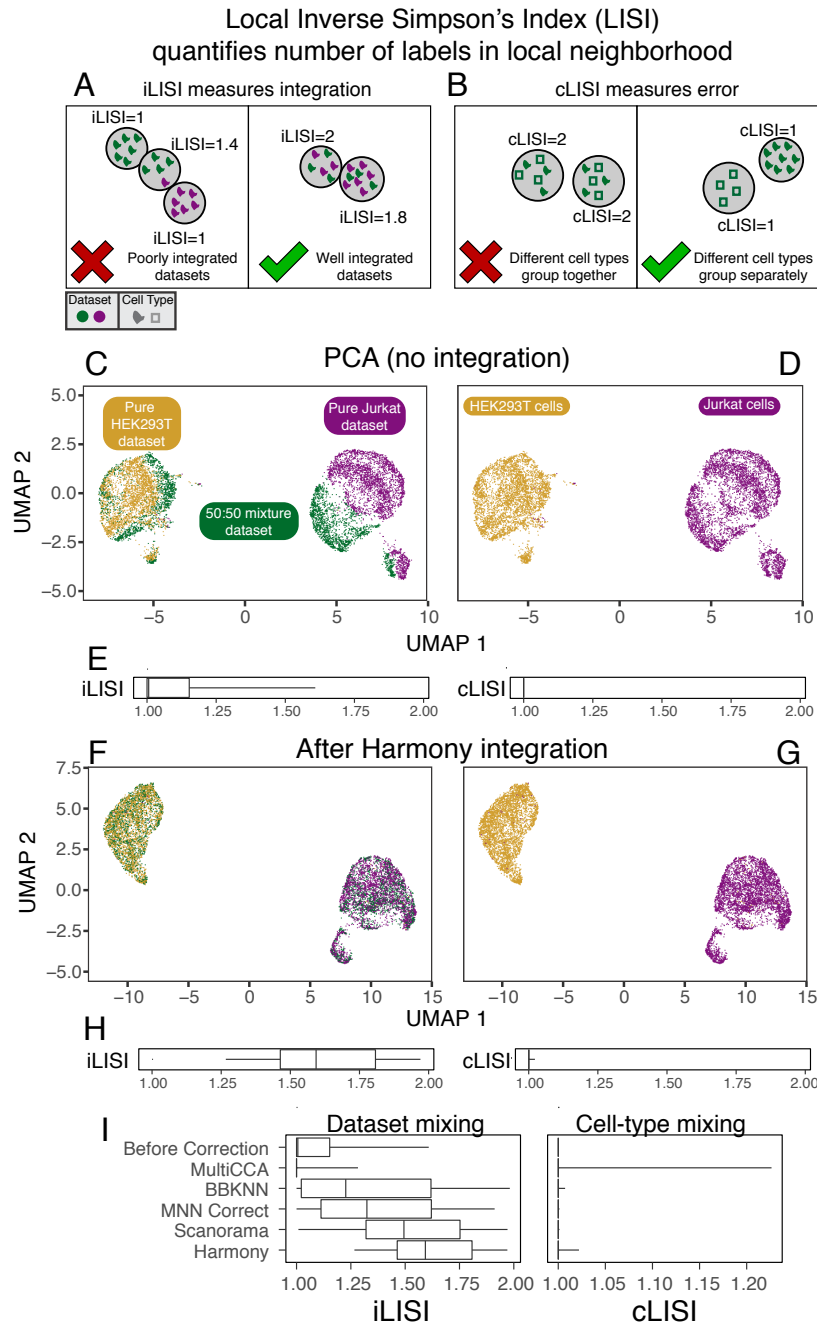

**Figure 2:** Quantitative assessment of dataset mixing and cell-type accuracy with cell line datasets. (A) iLISI measures the degree of mixing among datasets in an embedding, ranging from 1 in an unmixed space to  $B$  in a well mixed space.  $B$  is the number of datasets in the analysis. (B) cLISI measures integration accuracy using the same formulation but computed on cell-type labels instead. An accurate embedding has a cLISI close to 1 for every neighborhood, reflecting separation of different cell types. Jurkat and HEK293T cells from pure (purple and yellow) and mixed (green) cell-line datasets were analyzed together. Before Harmony integration, cells grouped by dataset (C) and known cell-type (D). iLISI and cLISI (E) were computed for every cell's neighborhood and summarized with quantiles (5, 25, 50, 75, 95). After Harmony integration, cells from the mixture dataset are mixed into the other datasets (F), achieved by mixing Jurkat with Jurkat cells and HEK293T with HEK293T cells (G). iLISI and cLISI (H) were re-computed in the Harmony embedding. (I) This analysis was repeated for other algorithms and compared against no integration and Harmony integration using iLISI and cLISI quantiles.

## 110 **Harmony Scales to Enable Analysis of Large Data**

111 As an integral part of the scRNAseq analysis pipeline, the integration algorithm must run in a reasonable amount of time  
112 and within the memory constraints of standard computers. To this end, we evaluated the computational performance of  
113 Harmony, measuring both the total runtime and maximum memory usage. To demonstrate the scalability of Harmony versus  
114 other methods, we downsampled from HCA data<sup>11</sup> (528,688 cells from 16 donors and 2 tissues) to create 5 benchmark  
115 datasets with 500,000, 250,000, 125,000, 60,000, and 30,000 cells. We reported the runtime (**Table S2**) and memory (**Table**  
116 **S3**) for all benchmarks. Harmony runtime scaled well for all datasets (**Figure 3A**), ranging from 4 minutes on 30,000 cells to  
117 68 minutes on 500,000 cells, 30 to 200 times faster than MultiCCA and MNN Correct. The runtimes for Harmony, BBKNN,  
118 and Scanorama were comparable for datasets with up to 125,000 cells. Harmony required very little memory (**Figure 3B**)  
119 compared to other algorithms, only 0.9GB on 30,000 cells and 7.2GB on 500,000 cells. At 125,000 cells, Harmony required  
120 30 to 50 times less memory than Scanorama, MNN Correct and Seurat MultiCCA; these other methods could not scale  
121 beyond 125,000 cells. Notably, BBKNN was the only other algorithm able to finish on the 500,000 cell dataset, taking 44  
122 minutes and 45GB of RAM. However, the BBKNN embedding did not achieve better integrated of tissues (**Figure 3C, S2A**,  
123 median iLISI 1.00, 95% [1.00, 1.10]) or donors (**Figure 3D, S2B**, median iLISI 1.60, 95% [1.00, 4.11]) above PCA alone  
124 (**Figure S2C** tissue median iLISI 1.00, 95% [1.00, 1.03], **Figure S2D** donor median iLISI 1.38, 95% [1.00, 3.14]).

125 Importantly, in addition to better computational performance of other algorithms Harmony returned a substantially more  
126 integrated space than other competing algorithms, allowing for the identification of shared cell types across tissues (**Figure**  
127 **3E, Table S4**, median iLISI 1.40, 95% [1.04, 1.97] compared to medians of 1.00 to 1.12) and donors (**Figure S3**, median  
128 iLISI 3.93, 95% [2.46, 4.95] compared to medians of 1.07 to 2.82). In the Harmony embedding, we clustered cells and  
129 were able to identify shared populations (**Figure 3F**) using canonical markers (**Figure S4**). These results demonstrate that  
130 Harmony is computationally efficient and capable of analyzing even large datasets ( $10^5$  -  $10^6$  cells) on personal computers.  
131 Alternative methods may require extensive parallelization to run modestly sized datasets.

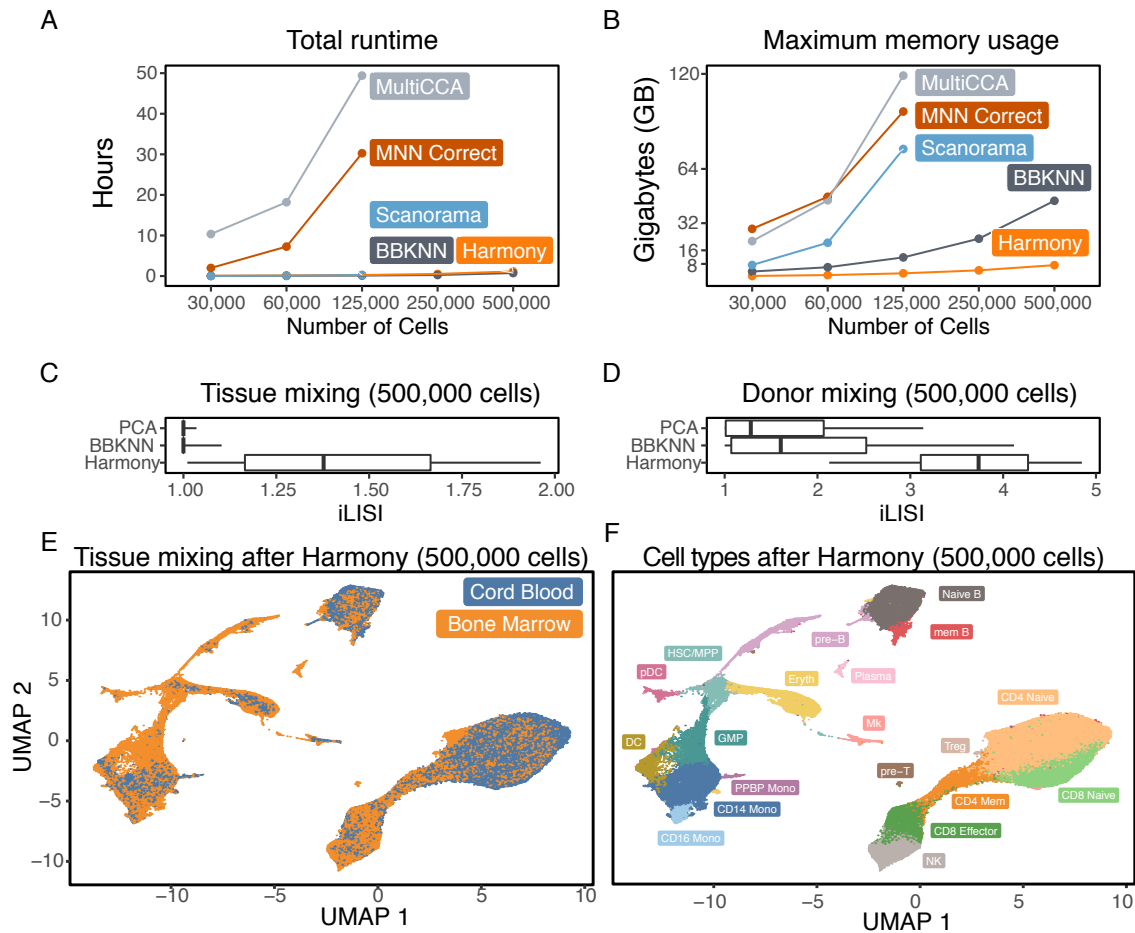

**Figure 3: Computational efficiency benchmarks.** We ran Harmony, BBKNN, Scanorama, MNN Correct, and MultiCCA on 5 downsampled HCA datasets of increasing sizes, from 25,000 to 500,000 cells. We recorded the (A) total runtime and (B) maximum memory required to analyze each dataset. Scanorama, MultiCCA, and MNN Correct were terminated for excessive memory requests on the 250,000 and 500,000 cell datasets. For Scanorama and Harmony, we quantified the extent of integration in the 500,000 cell benchmark for (C) the two tissues (cord blood and bone marrow) and (D) the 16 donors. For reference, (C) and (D) report the iLISI scores prior to integration. The mixing between tissues in the Harmony embedding is visualized in (E). In the Harmony embedding, (F) we clustered cells and labeled populations by canonical markers: pre-T cells, CD4 Naive T cells, CD4 Memory T cells, T-regs, CD8 Naive T cells, CD8 Effector T cells, natural killer cells (NK), pre-B cells, Naive B cells, Memory B cells, plasma cells, plasmacytoid dendritic cells (pDC), conventional dendritic cells (DC), granulocyte macrophage progenitor (GMP), CD16- monocytes (CD14 Mono), CD16+ monocytes (CD16 Mono), a population of monocytes also positive for Megakaryocyte markers (PPBP Mono), Megakaryocytes (Mk), Erythroid progenitors (Eryth), and a cluster of hematopoietic stem cells and multipotent progenitor cells (HSC/MPP).

## 132 **Deep Integration Enables Identification of Broad and Fine-Grained PBMCs Subpopulations**

133 To assess how effective Harmony might be under more challenging scenarios, we gathered three datasets of human PBMCs,  
134 each assayed on the Chromium 10X platform but prepared with different protocols: 3-prime end v1 (3pV1), 3-prime end  
135 v2 (3pV2), and 5-prime (5p) end chemistries. After pooling all the cells together, we performed a joint analysis. Before  
136 integration, cells group primarily by dataset (**Figure 4A**, median iLISI 1.00, 95% [1.00, 1.00]). Harmony integrates the  
137 three datasets (**Figure 4B**, median iLISI 1.96, 95% [1.36, 2.56]), more than other methods (**Figure 4C**). To assess accu-  
138 racy, within each dataset, we separately annotated (online methods) broad cell clusters with canonical markers of major  
139 expected populations (**Figure S5**): monocytes (*CD14+* or *CD16+*), dendritic cells (*FCERIA+*), B cells (*CD20+*), T cells  
140 (*CD3+*), Megakaryocytes (*PPBP+*), and NK cells (*CD3-/GNLY+*) before clustering. We observed that Harmony retained  
141 differences among cell types (**Figure 4D** median cLISI 1.00, 95% [1.00, 1.02]). The greater dataset integration, compared  
142 to other algorithms, affords a unique opportunity to identify fine-grained cell subtypes. Using canonical markers (**Figure**  
143 **4E**), we identified shared subpopulations of cells (**Figure 4F**) including naive CD4 T (*CD4+/CCR7+*), effector memory  
144 CD4 T (*CD4+/CCR7-*), Treg (*CD4+/FOXP3+*), memory CD8 (*CD8+/GZMK-*), effector CD8 T (*CD8+/GZMK+*), naive B  
145 (*CD20+/CD27-*), and memory B cells (*CD20+/CD27+*). In the embeddings produced by other algorithms, the median iLISI  
146 did not exceed 1.1 (**Table S5**). Accordingly, the subtypes identified with Harmony reside in dataset-specific, rather than  
147 dataset-mixed clusters (**Figure S6**). These results show that Harmony successfully accounts for technical variation among  
148 different protocols and integrates many different cell types while preserving large-scale and fine-grained structures in the  
149 data.

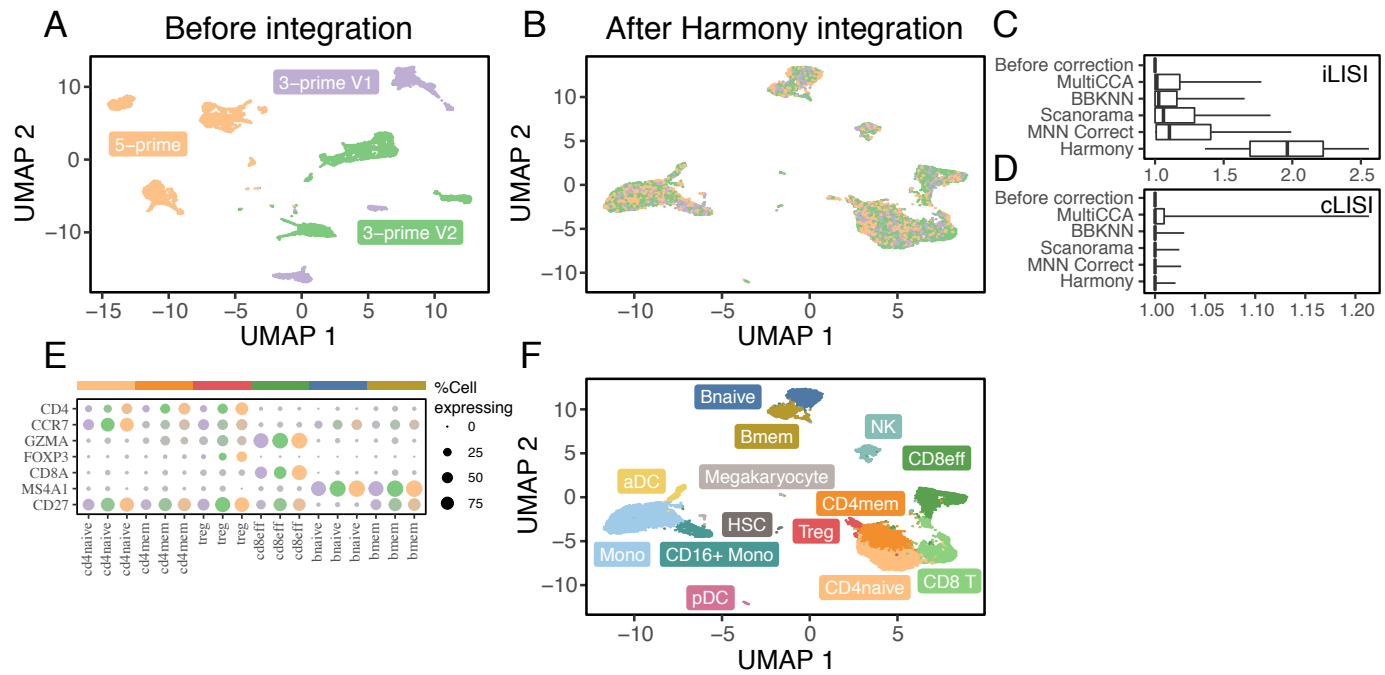

Figure 4: Fine-grained subpopulation identification in PBMCs across technologies. Three PBMC datasets were assayed with 10X, using different library construction protocols: 5-prime (orange), 3-prime V1 (purple), and 3-prime V2 (green). Before integration (A), cells group by dataset. After Harmony integration (B), datasets are mixed together. (C) Harmony achieves the most thorough integration among datasets, while preserving (D) cell type differences. Using canonical markers (E), we identified (F) 5 shared subtypes of T cells and 2 shared subtypes of B cells. (G) Other integration algorithms fail to group these cells by subtype.

## 150 Simultaneous Integration Across Donors and Technologies Identifies Rare Pancreas Islet Subtypes

151 We considered a more complex experimental design, in which integration must be performed simultaneously over more than  
 152 one variable. We gathered human pancreatic islet cells from independent five studies<sup>12–16</sup>, each of which were generated  
 153 with a different technological platform. Integration across platforms is already challenging. However, within two<sup>12,13</sup> of the  
 154 datasets, the authors also reported significant donor-specific effects. In this scenario, a successful integration of these studies  
 155 must account for the effects of both technologies and donors, which may both affect different cell types in different ways.  
 156 Harmony is the only single cell integration algorithm that is able to explicitly integrate over more than one variable, hence  
 157 we omit a comparison against other methods.

158 As before, we assess cell type accuracy cLISI with canonical cell types identified independently within each dataset  
 159 (Figure S7): alpha (*GCG+*), beta (*MAFA+*), gamma (*PPY+*), delta (*SST+*), acinar (*PRSSI+*), ductal (*KRT19+*), endothelial  
 160 (*CDH5+*), stellate (*COLIA2+*), and immune (*PTPRC+*). Since there are two integration variables, we assess both donor iLISI  
 161 and technology iLISI. Prior to integration, PCA separates cells by technology (Figure 5A,E, median iLISI 1.00 95% [1.00,  
 162 1.06]), donor (Figure 5B,E, median iLISI 1.42 95% [1.00, 5.50]), and cell type (Figure 5E, median cLISI 1.00 95% [1.00,  
 163 1.48]). The wide range of donor-iLISI reflects that in the CEL-seq, CEL-seq2, and Fluidigm C1 datasets, many donors were  
 164 well mixed prior to integration. Harmony integrates cells by both technology (Figure 5C,E, median iLISI 2.27 95% [1.31,



165 3.27]) and donor (**Figure 5D,E**, median iLISI 4.71 95% [1.81, 6.36]).

166 Harmony was able to discern rare cell subtypes (**Figure 5F**) across the 5 datasets (**Figure 5G**). We labeled previously  
167 described subtypes using canonical markers: activated stellate cells (*PDGFRA+*), quiescent stellate cells (*RGS5+*), mast cells  
168 (*BTK+*), macrophages (*CIQC+*), and beta cells under endoplasmic reticulum (ER) stress (**Figure 5H**). Beta ER stress cells  
169 may represent a dysfunctional population. This cluster has significantly lower expression of genes key to beta cell identify<sup>17</sup>  
170 and function:<sup>18</sup> *PDX1*, *MAFA*, *INSM1*, *NEUROD1* (**Figure 5I**). Further, Sachdeva et al<sup>19</sup> suggest that *PDX1* deficiency  
171 makes beta cells less functional and exposes them to ER stress induced apoptosis.

172 Intriguingly, we also observed an alpha cell subset that to our knowledge, has not been previously described. This cluster  
173 was also enriched with genes involved in ER stress (**Figure 5J**, *DDIT3*, *ATF3*, *ATF4*, and *HSPA5*). Similar to the beta  
174 ER stress population, these alpha cells also expressed significantly lower levels of genes necessary for proper function:<sup>20,21</sup>  
175 *GCG*, *ISL1*, *ARX*, and *MAFB* (**Figure 5K**). A recent study<sup>22</sup> reported ER stress in alpha cells in mice and linked the stress to  
176 dysfunctional glucagon secretion. Moreover, we found that the proportions of alpha and beta ER stress cells are significantly  
177 correlated (spearman  $r=0.46$ ,  $p=0.004$ , **Figure 5L**) across donors in all datasets. These results suggest a basis for alpha cell  
178 injury that might parallel beta cell dysfunction in humans during diabetes.<sup>23</sup>



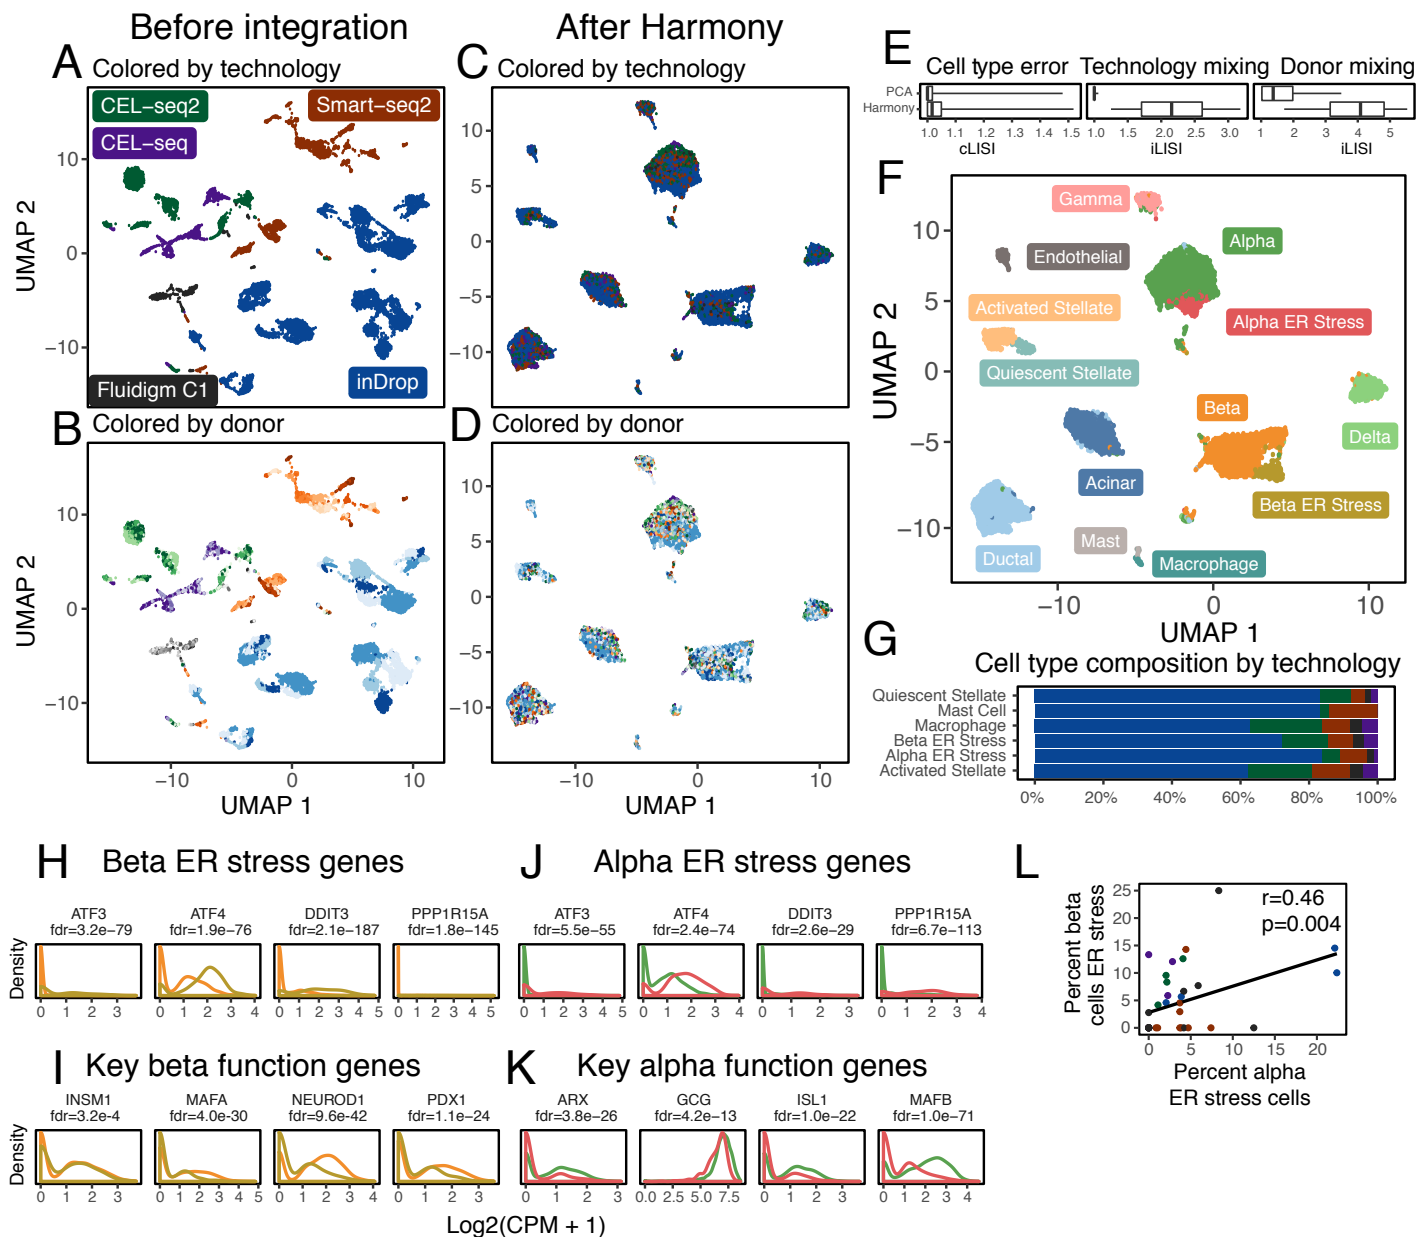

**Figure 5:** Integration of pancreatic islet cells by both donor and technology. Human pancreatic islet cells from 36 donors were assayed on 5 different technologies. Cells initially group by (A) technology, denoted by different colors, and (B) donor, denoted by shades of colors. Harmony integrates cells simultaneously across (C) technology and (D) donor. Integration across both variables was quantified with iLISI (E) and error was computed with cLISI (E). Clustering in the Harmony embedding identified common and rare cell types, including a previously undescribed alpha population. Except for activated stellate cells, all rare cell types were found across the 5 technology datasets (G). The new alpha cluster was enriched for ER stress genes (I), just like the previously identified beta ER stress cluster (J). The abundances of the two ER stress populations were correlated across donors (H). Key genes necessary for endocrine function were downregulated in the alpha (K) and beta (L) ES stress clusters.

## 179 Discussion

180 We showed that Harmony address the three key challenges we laid out for single cell integration analyses: scaling to large  
181 datasets, identification of both broad populations and fine-grained subpopulations, and flexibility to accommodate complex  
182 experimental design. We evaluated the degree of mixing among datasets using a quantitative metric, the iLISI. Apart from  
183 its use benchmarking, iLISI was particularly important in analyses with more than 3 datasets. Here, we observed that the  
184 commonly utilized approach of assessing integration visually was subjective and insensitive, particularly when the number  
185 of samples, batches or cell types was large. iLISI provides a quantitative and interpretable metric to help guide analysis.  
186 In the computational efficiency benchmarks, we found that 3 of the 5 algorithms were not able to scale beyond 125,000  
187 cells because they exceeded the memory resources of our 128GB servers. We were struck by the fact many researchers  
188 routinely analyze data on personal computers, which often do not exceed 8 or 16GB. Harmony, which only required 7.2GB  
189 to integrate 500,000 cells, is the only algorithm that would enable the integration of large datasets on personal computers.  
190 With the pancreatic islet meta-analysis, we demonstrated that Harmony is able to account simultaneously for donor and  
191 technology specific effects. One solution to this multi-level problem stepwise is to first globally regress out one variable  
192 from the gene expression values and then performing single cell integration on the resulting expression matrix. Harmony  
193 allows for cell-type aware integration of both variables, simultaneously avoiding global correction terms that treat all cells  
194 uniformly. However, the global regression strategy is flexible enough to account for continuous variables, such as read depth  
195 or cell quality. In the future, Harmony should also be able to account for such non-discrete sources of variation.

196 We noticed that it is not an uncommon practice to apply a batch-sensitive gene scaling step before using a single-  
197 cell integration algorithm. Specifically, many investigators scale gene expression values within datasets separately, before  
198 pooling cells into a single matrix. We show (Supplementary Results) that this strategy may make it easier to integrate datasets  
199 (**Figure S8A,B**) in the rare situation in which all cell populations and subpopulations are present across all analyzed datasets.  
200 However, when the datasets consist of overlapping but not identical populations, this scaling strategy is less effective (**Figure**  
201 **S8C**) and may indeed even increase error (Figure S8D). For this reason, we do not use this scaling strategy in this manuscript.  
202 As part of a universal pipeline, Harmony finds highly integrated embeddings without the need for within-dataset scaling.

203 Harmony allows the user to set a hyperparameter for each covariate that guides how deeply to integrate over each source  
204 of variation. When the penalty is 0, Harmony performs minimal integration. Curiously, we noticed that for small inter-  
205 datasets differences, cells from multiple datasets cluster together without the penalty. In this case, Harmony still integrates  
206 the cells during the linear correction phase. On the other hand, one could imagine that with an infinitely large penalty  
207 hyperparameter, Harmony would overmix datasets during clustering and hence overcorrect the data. We evaluated the effect  
208 of the diversity penalty in the PBMCs example (see Supplementary Results) and observed that the Harmony embedding  
209 is robust to a wide range of penalties (**Figure S9**). Nonetheless, as with any integration algorithm, we urge the user to  
210 understand the effects of hyperparameters and experiment with several values.

211 Harmony is designed to accept a matrix of cells and covariate labels for each cell as input, and it will output a matrix  
212 of adjusted coordinates with the same dimensions as the input matrix. As such, Harmony should be used as an upstream  
213 step in a full analysis pipeline. Downstream analyses, such as clustering, trajectory analysis, and visualization, can use  
214 the integrated Harmony adjusted coordinates instead of the commonly used PCA coordinates. As a corollary, Harmony  
215 does not alter the expression values of individual genes to account for dataset-specific differences. We recommend using a  
216 batch-aware approach, such as a linear model with covariates, for differential expression analysis.

217 In our meta-analysis of pancreatic islet cells, we identified a previously undescribed rare subpopulation of alpha ER  
218 stress cells (**Figure 5F,J**). Similar to beta ER stress cells, they appear to have reduced endocrine function (**Figure 5K**).  
219 Because Harmony integrated over both donors and technology (**Figure 5C,D,E**), we were able to identify the significant  
220 association between the proportion of alpha to beta ER stress populations across donors (**Figure 5L**). Based on this corre-  
221 lation and similar stress response patterns, it is possible that these two populations are involved in a coordinated response  
222 to an environmental stress. Beta cell dysfunction is key to the pathogenesis of diabetes<sup>23</sup>. Experimental follow up on this  
223 alpha subtype and its relation to beta ER stress cells may yield insight into disease. This analysis demonstrates the power of  
224 Harmony's multilevel integration to mix diverse datasets and uncover potentially novel rare cell types.

## 225 Online Methods

### 226 Harmony

227 The Harmony algorithm inputs some embedding ( $Z$ ) of cells, along with their batch assignments ( $\phi$ ), and returns a batch  
228 corrected embedding ( $\hat{Z}$ ). This algorithm, summarized as **Algorithm 1** below, iterates between two complementary stages:  
229 maximum diversity clustering (**Algorithm 2**) and a mixture model based linear batch correction (**Algorithm 3**). The clus-  
230 tering step uses the a batch corrected embedding  $\hat{Z}$  to compute a soft assignment of cells to clusters, encoded in the matrix  
231  $R$ . The correction step uses these soft clusters to compute a new corrected embedding from the original one. Efficient  
232 implementations of Harmony, including the clustering and correction subroutines, are available as part of an R package at  
233 <https://github.com/immunogenomics/harmony>.

---

#### Algorithm 1 Harmony

---

```
function HARMONIZE( $Z, \phi^{(1)} \dots \phi^{(F)}$ )  
   $\hat{Z} \leftarrow Z$   
  repeat  
     $R \leftarrow \text{CLUSTER}(\hat{Z}, \phi^{(1)} \dots \phi^{(F)})$   
     $\hat{Z} \leftarrow \text{CORRECT}(Z, R, \phi^{(1)})$   
  until convergence  
  return  $\hat{Z}$ 
```

---

234 Note that the correction procedure uses  $Z$ , not  $\hat{Z}$  to regress out confounder effects. In this way, we restrict correction to  
235 a linear model of the original embedding. An alternative approach would use the output  $\hat{Z}$  of the last iteration as input to

236 the correction procedure. Thus, the final  $\hat{Z}$  would be the result of a series of linear corrections of the original embedding.  
237 While this allows for more expressive transformations, we found that in practice, this can over correct the data. Our choice to  
238 limit the transformation reflects the notion in the introduction. Namely, if we had perfect knowledge of the cell types before  
239 correction, we would linearly regress out batch within each cell type.

240 Lastly, we note that  $Z$  can be any arbitrary embedding of the cells. In this paper, we use principal components for  
241 scRNAseq datasets. However, Harmony can be efficiently run on any low dimensional embedding of the data, including  
242 diffusion maps, autoencoders, or independent components.

## 243 Glossary

244 For reference, we define all data structures used in all Harmony functions. For each one, we define its dimensions and  
245 possible values, as well as an intuitive description of what it means in context. The dimensions are stated in terms of  $\mathbf{d}$ :  
246 the dimensionality of the embedding (e.g. number of PCs),  $\mathbf{B}$ : the number of batches,  $\mathbf{N}$ : the number of samples,  $\mathbf{N}_b$ : the  
247 number of samples in batch  $b$ , and  $\mathbf{K}$ : the number of clusters.

248  $Z \in \mathbb{R}^{d \times N}$ . The input embedding, to be corrected in Harmony. This is often PCA embeddings of cells.

249  $\hat{Z} \in \mathbb{R}^{d \times N}$ . The integrated embedding, output by Harmony.

250  $R \in [0, 1]^{K \times N}$ ,  $\forall_i \sum_{k=1}^K R_{ki} = 1$ . The soft cluster assignment matrix of cells (columns) to clusters (rows). Each column  
251 is a probability distribution and thus sums to 1.

252  $\phi \in \{0, 1\}^{B \times N}$  One-hot assignment matrix of cells (columns) to batches (rows).

253  $Pr_b \in [0, 1]^B$ . Frequency of batches.

254  $O \in [0, 1]^{K \times B}$  The observed co-occurrence matrix of cells in clusters (rows) and batches (columns).

255  $E \in [0, 1]^{K \times B}$  The expected co-occurrence matrix of cells in clusters and batches, under the assumption of independence  
256 between cluster and batch assignment.

257  $Y \in [0, 1]^{d \times K}$  Cluster centroid locations in the kmeans clustering algorithm.

258  $\mu \in \mathbb{R}^{d \times K}$  Centroid locations. Conceptually the same as  $Y$  but not normalized to unit length. Used in GMM Correct.

259  $\beta \in \mathbb{R}^{d \times K \times B}$  Batch-specific centroid locations. Used in GMM Correct.

260 Note that in the case of multiple ( $F$ ) batch variables,  $\phi$ ,  $\theta$ ,  $O$ , and  $E$  are independently defined for each batch  $f$ . We  
261 denote these by  $\phi^{(f)}$ ,  $\theta_f$ ,  $O^{(f)}$ , and  $E^{(f)}$  for each batch from 1 to  $F$ .

## 262 Maximum Diversity Clustering

263 We developed a clustering algorithm to maximize the diversity among batches within clusters. We present this method as  
264 follows. First, review a previously published objective function for soft k-means clustering.

265 We then add a diversity maximizing regularization term to this objective function, and derive this regularization term as  
266 the penalty on statistical dependence between two random variables: batch membership and cluster assignment. We then  
267 derive and present pseudocode for an algorithm to optimize the objective function. Finally, we explain key details of the  
268 implementation.

### 269 Background: Entropy regularization for Soft K-means

270 The basic objective function for classical K means clustering, in which each cell belongs to exactly one cluster, is defined by  
271 the distance from cells to their assigned centroids.

$$\begin{aligned} \min_{R,Y} \sum_{i,k} R_{i,k} \|Z_i - Y_k\|^2 & \quad (1) \\ s.t. \forall_i \forall_k R_{ki} \in \{0, 1\} & \end{aligned}$$

272 Above,  $Z$  is some feature space of the data, shared by centroids  $Y$ .  $R_{i,k}$  can takes values 0 or 1, denoting membership of  
273 cell  $i$  in cluster  $k$ . In order to transform this into a soft clustering objective, we follow the direction of<sup>24</sup> and add a an entropy  
274 regularization term over  $R$ , weighted by a hyperparameter  $\sigma$ . Now,  $R_{ki}$  can take values between 0 and 1, so long as for a  
275 given cell  $i$ , the sum over cluster memberships  $\sum_k R_{ki}$  equals 1. That is,  $R_{i\cdot}$  must be a proper probability distribution with  
276 support  $[1, K]$ .

$$\begin{aligned} \min_{R,Y} \sum_{i,k} R_{ki} \|Z_i - Y_k\|^2 + \sigma R_{ki} \log(R_{ki}) & \quad (2) \\ s.t. \forall_i \forall_k R_{ki} > 0, \sum_{k=1}^K R_{ki} = 1 & \end{aligned}$$

277 As  $\sigma$  approaches 0, this penalty approach hard clustering. As  $\sigma$  approaches infinity, the entropy of  $R$  outweighs the  
278 data-centroid distances. In this case, each data point is assigned equally to all clusters.

### 279 Objective Function for Maximum Diversity Clustering

280 The full objective function for Harmony's clustering builds on the previous section. In addition to soft assignment regular-  
281 ization, the function below penalizes clusters with low batch-diversity, for all defined batch variables. This penalty, derived

282 in the following section, depends on the cluster and batch identities  $\Omega(R, \phi_i^{(1)} \dots \phi_i^{(F)}) = \sum_{i,k} R_{ki} \sum_f \log(O_{ki}^{(f)} / E_{ki}^{(f)}) \phi_i^{(f)}$ .

$$\begin{aligned} \min_{R,Y} \sum_{i,k} R_{ki} \|Z_i - Y_k\|^2 + \sigma R_{ki} \log(R_{ki}) \\ + \sigma \sum_f \theta_f R_{ki} \log\left(\frac{O_{ki}^{(f)}}{E_{ki}^{(f)}}\right) \\ \text{s.t. } \forall_i \forall_k R_{ki} > 0, \sum_{k=1}^K R_{ki} = 1 \end{aligned} \quad (3)$$

283 For each batch variable, we add a new parameter  $\theta_f$ .  $\theta_f$  decides the degree of penalty for dependence between batch  
284 membership and cluster assignment. When  $\forall_f \theta_f = 0$ , the problem reverts back to (2), with no penalty on dependence. As  
285  $\theta_f$  increases, the objective function favors more independence between batch  $f$  and cluster assignment. As  $\theta_f$  approaches  
286 infinity, it will yield a degenerate solution. In this case, each cluster has an equivalent distribution across batch  $f$ . However,  
287 the distances between cells and centroids may be large. Finally,  $\sigma$  is added to this term for notational convenience in the  
288 gradient calculations.

289 We found that this clustering works best when we compute the cosine, rather than Euclidean distance, between  $Z$  and  
290  $Y$ . Haghverdi et al<sup>25</sup> showed that the squared Euclidean distance is equivalent to cosine distance when the vectors are  $L_2$   
291 normalized. Therefore, assuming that all  $Z_i$  and  $Y_k$  have a unity  $L_2$  norm, the squared Euclidean distance above can be  
292 re-written as a dot product.

$$\begin{aligned} \min_{R,Y} \sum_{i,k} R_{ki} 2(1 - Y_k^T Z_i) + \sigma R_{ki} \log(R_{ki}) \\ + \sigma \sum_f \theta_f R_{ki} \log\left(\frac{O_{ki}^{(f)}}{E_{ki}^{(f)}}\right) \\ \text{s.t. } \forall_i \forall_k R_{ki} > 0, \sum_{k=1}^K R_{ki} = 1 \end{aligned} \quad (4)$$

### 293 Cluster Diversity Score

294 Here, we discuss and derive the diversity penalty term  $\Omega(\cdot)$ , defined in the previous section. For simplicity, we discuss  
295 diversity with respect to a single batch variable, as the multiple batch penalty terms are additive in the objective function.  
296 The goal of  $\Omega(\cdot)$  is to penalize statistical dependence between batch identity and cluster assignment. In statistics, dependence  
297 between two discrete random variables is typically measured with the  $\chi^2$  statistic. This test considers the frequencies with  
298 which different values of the two random variables are observed together. The observed co-occurrence counts ( $O$ ) are  
299 compared to the counts expected under independence ( $E$ ). For practical reasons, we do not use the  $\chi^2$  statistic directly.

300 Instead, we use the Kullback Leibler Divergence ( $D_{KL}$ ), an information theoretic distance between two distributions. In this  
 301 section, we define the  $O$  and  $E$  distributions, as well the  $D_{KL}$  penalty, in the context of the probabilistic cluster assignment  
 302 matrix  $R$ .

$$\begin{aligned}
 O_{bk} &= NPr(b, k) \\
 O_{bk} &= NPr(k|b)Pr(b) \\
 O_{bk} &= N \left( \sum_i \mathbb{1}_{i \in b} \frac{R_{ki}}{N_b} \right) \frac{N_b}{N} \\
 O_{bk} &= \sum_i \mathbb{1}_{i \in b} R_{ki} \tag{5} \\
 E_{bk} &= NPr(b, k) \\
 E_{bk} &= NPr(k)Pr(b) \\
 E_{bk} &= N \left( \sum_i \frac{R_{ki}}{N} \right) \frac{N_b}{N} \\
 E_{bk} &= \frac{N_b}{N} \sum_i R_{ki} \tag{6}
 \end{aligned}$$

303 Next, we define the KL divergence in terms of  $R$ . Note that both  $O$  and  $E$  depend on  $R$ . However, in the derivation below,  
 304 we expand one of the  $O$  terms. This serves a functional purpose in the optimization procedure, described later. Intuitively,  
 305 in the update step of  $R$  for a single cell, we compute  $O$  and  $E$  on all the other cells. In this way, we decide how to assign the  
 306 single cell to clusters given the current distribution of batches amongst clusters.

$$\begin{aligned}
 D_{KL}(E||O) &= \sum_{b=1}^B \sum_{k=k}^K O_{b,k} \log \left( \frac{O_{bk}}{E_{bk}} \right) \\
 D_{KL}(E||O) &= \sum_{b=1}^B \sum_{k=k}^K \left[ \sum_{i=1}^N \mathbb{1}_{i \in b} R_{ki} \right] \log \left( \frac{O_{bk}}{E_{bk}} \right) \\
 D_{KL}(E||O) &= \sum_{i=1}^N \sum_{k=k}^K \sum_{b=1}^B \mathbb{1}_{i \in b} R_{ki} \log \left( \frac{O_{bk}}{E_{bk}} \right) \\
 D_{KL}(E||O) &= \sum_{i=1}^N \sum_{k=k}^K R_{ki} \log \left( \frac{O_{bk}}{E_{bk}} \right) \phi_i \tag{7}
 \end{aligned}$$

307 For multiple batch variables, we sum over these convergence terms to get the penalty in equation 3.

$$\Omega(R, \phi^{(1)} \dots \phi^{(F)}) = \sum_f D_{KL}(E^{(f)}||O^{(f)})$$

308 **Optimization**

309 Optimization of 4 admits an Expectation-Maximization framework, iterating between cluster assignment ( $R$ ) and centroid  
310 ( $Y$ ) estimation .

311 **Cluster assignment  $R$ .** Using the same strategy as,<sup>24</sup> we solve for the optimal assignment  $R_i$  for each cell  $i$ . First we set up  
312 the Lagrangian with dual parameter  $\lambda$  and solve for the partial derivative wrt each cluster  $k$ .

$$\begin{aligned}
 L(R_i, \lambda) &= \sum_{k=1}^K R_{ki} 2(1 - Y_k^T Z_i) + \sigma R_{ki} \log R_{ki} \\
 &\quad + \sigma R_{ki} \sum_f \theta_f \log \left( \frac{O_{ki}^{(f)}}{E_{ki}^{(f)}} \right) + \lambda \left[ \left( \sum_{k=1}^K R_{ki} \right) - 1 \right] \\
 \frac{\delta L(R_i, \lambda)}{\delta R_{ki}} &= 0 = 2(1 - Y_k^T Z_i) + \sigma + \sigma \log R_{ki} \\
 &\quad + \sigma \sum_f \theta_f \log \left( \frac{O_{ki}^{(f)}}{E_{ki}^{(f)}} \right) + \lambda \\
 \log R_{ki} &= -\frac{2(1 - Y_k^T Z_i)}{\sigma} - 1 - \theta_f \sum_f \log \left( \frac{O_{ki}^{(f)}}{E_{ki}^{(f)}} \right) - \frac{\lambda}{\sigma} \\
 R_{ki} &= \prod_f \left( \frac{O_{ki}^{(f)}}{E_{ki}^{(f)}} \right)^{\theta_f} \exp \left( -\frac{2(1 - Y_k^T Z_i)}{\sigma} \right) \\
 &\quad \cdot \exp \left( -\frac{\lambda}{\sigma} - 1 \right)
 \end{aligned}$$

313 Next, we use the probability constraint  $\sum_{k=1}^K R_{ki} = 1$  to solve for  $\exp(-\frac{\lambda}{\sigma} - 1)$ .

$$\begin{aligned}
 1 &= \sum_{k=1}^K R_{ki} \\
 1 &= \sum_{k=1}^K \prod_f \left( \frac{O_{ki}^{(f)}}{E_{ki}^{(f)}} \right)^{\theta_f} \exp \left( -\frac{2(1 - Y_k^T Z_i)}{\sigma} \right) \\
 &\quad \cdot \exp \left( -\frac{\lambda}{\sigma} - 1 \right) \\
 \exp \left( -\frac{\lambda}{\sigma} - 1 \right) &= \frac{1}{\sum_{k=1}^K \prod_f \left( \frac{O_{ki}^{(f)}}{E_{ki}^{(f)}} \right)^{\theta_f} \exp \left( -\frac{2(1 - Y_k^T Z_i)}{\sigma} \right)}
 \end{aligned}$$

314 Finally, we substitute  $\exp(-\frac{\lambda}{\sigma} - 1)$  to remove the dependency of  $R_{ki}$  on the dual parameter  $\lambda$ .



$$R_{ki} = \frac{\prod_f \left( \frac{O_{ki}^{(f)}}{E_{ki}^{(f)}} \right)^{\theta_f} \exp \left( - \frac{2(1-Y_k^T Z_i)}{\sigma} \right)}{\sum_{k=1}^K \prod_f \left( \frac{O_{ki}^{(f)}}{E_{ki}^{(f)}} \right)^{\theta_f} \exp \left( - \frac{2(1-Y_k^T Z_i)}{\sigma} \right)} \quad (8)$$

315 The denominator term above makes sure that  $R_i$  sums to one. In practice (alg 2), we compute the numerator and divide  
316 by the sum.

317 **Centroid Estimation  $Y$ .** Our clustering algorithm uses cosine distance instead of Euclidean distance. In the context of  
318 kmeans clustering, this approach was pioneered by Dhillon et al.<sup>26</sup> We adopt their centroid estimation procedure for our  
319 algorithm. Instead of just computing the mean position of all cells that belong in cluster  $k$ , this approach then  $L_2$  normalizes  
320 each centroid vector to make it unit length. Note that normalizing the sum over cells is equivalent to normalizing the mean  
321 of the cells. In the soft clustering case, this summation is an expected value of the cell positions, under the distribution  
322 defined by  $R$ . That is, re-normalizing  $R_{.k}$  for cluster  $k$  gives the probability of each cell belonging to cluster  $k$ . Again, this  
323 re-normalization is a scalar factor that is irrelevant once we  $L_2$  normalize the centroids. Thus, the unnormalized expectation  
324 of centroid position for cluster  $k$  would be  $Y_k = \mathbb{E}_{R_{.k}} Z = \sum_i R_{ki} Z_i$ . In vector form, for all centroids, this is  $Y = ZR^T$ .  
325 The final position of the cluster centroids is given by this summation followed by  $L_2$  normalization of each centroid. This  
326 procedure is implemented in algorithm 2 in the section  $\{Compute Cluster Centroids\}$ .

---

## Algorithm 2 Maximum Diversity Clustering

---

```

function CLUSTER( $\hat{Z}, \phi^{(1)} \dots \phi^{(F)}$ )
  {Initialize Cluster Centroids}
   $Y \leftarrow \mathbf{0}_{[d \times K]}$ 
  for  $b \leftarrow 1 \dots B$  do
     $sample \leftarrow K$  random points from batch  $b$ 
     $Y \leftarrow Y + Z_{sample}$ 

  for  $i \leftarrow 1 \dots N$  do ▷  $L_2$  Normalization
     $Y_{:,i} \leftarrow Y_{:,i} / \|Y_{:,i}\|_2$ 
     $\hat{Z}_{:,i} \leftarrow \hat{Z}_{:,i} / \|\hat{Z}_{:,i}\|_2$ 

  for  $f \leftarrow 1 \dots F$  do
     $E^{(f)} \leftarrow R \mathbf{1} P r_b^T$ 
     $O^{(f)} \leftarrow R [\phi^{(f)}]^T$ 

  repeat
    for all Update Blocks do
       $in \leftarrow$  cells to update in block
      {Compute  $O$  and  $E$  on left out data}
      for  $f \leftarrow 1 \dots F$  do
         $E^{(f)} \leftarrow E^{(f)} - R_{in} \mathbf{1} P r_b^T$ 
         $O^{(f)} \leftarrow O^{(f)} - R_{in} [\phi_{in}^{(f)}]^T$ 

        {Update and Normalize  $R$ }
         $R_{in} \leftarrow \exp \left( - \frac{2(1 - Y^T \hat{Z}_{in})}{\sigma} \right)$ 
         $\Omega \leftarrow \prod_f (E^{(f)} + \alpha E^{(f)} / O^{(f)} + \alpha E^{(f)})^{\theta_f} \phi_{in}^{(f)}$ 
         $R_{in} \leftarrow R_{in} \circ \Omega$ 
         $R_{in} \leftarrow R_{in} / \mathbf{1}^T R_{in}$  ▷  $R_i$  sum to one

      {Compute  $O$  and  $E$  with full data}
      for  $f \leftarrow 1 \dots F$  do
         $E^{(f)} \leftarrow E^{(f)} + R_{in} \mathbf{1} P r_b^T$ 
         $O^{(f)} \leftarrow O^{(f)} + R_{in} [\phi_{in}^{(f)}]^T$ 

        {Compute Cluster Centroids}
         $Y \leftarrow Z R^T$ 
        for  $i \leftarrow 1 \dots N$  do ▷  $L_2$  Normalization
           $Y_{:,i} \leftarrow Y_{:,i} / \|Y_{:,i}\|_2$ 

  until convergence
  return  $R$ 

```

---

### 327 Implementation Details

328 The update steps of  $R$  and  $Y$  derived above form the core of Maximum Diversity Clustering, outlined as algorithm 2. This  
 329 section explains the other implementation details of this pseudocode. Again, for simplicity, we discuss details related to  
 330 diversity penalty terms  $\theta$ ,  $\phi$ ,  $O$ , and  $E$  for each single batch variable independently.

331 **Block Updates of  $R$ .** Unlike in regular kmeans, the optimization procedure above for  $R$  cannot be faithfully parallelized, as  
 332 the values of  $O$  and  $E$  change with  $R$ . The exact solution therefore depends an online procedure. For speed, we can coarse

333 grain this procedure and update  $R$  in small blocks (e.g. 5% of the data). Meanwhile,  $O$  and  $E$  are computed on the held out  
334 data. In practice, this approach succeeds in minimizing the objective for sufficiently small block size. In the algorithm, these  
335 blocks are included as the Update Blocks in the for loop.

336 **Centroid Initialization.** We initialize cluster centroids using a batch balanced random medeoid approach. We randomly  
337 select  $K$  cells within each batch for a total of  $B \times K$  centroids. We then randomly select one centroid from each batch,  
338 average it, and  $L_2$  normalize it to create a total of  $K$  centroids. With this strategy, any single centroid is unlikely to be  
339 centered within one batch.

340 **Regularization for Smoother Penalty.**

341 The diversity penalty term  $(E_{bk}/O_{bk})^\theta$  can tend towards infinity if there are no cells from batch  $b$  assigned to cluster  $k$ .  
342 This extreme penalty can erroneously force cells into an inappropriate cluster. To protect against this, we smooth this term  
343 to ensure that the denominator will not be zero. The strategy is to use  $E$  as a prior and add some portion  $\alpha \in [0, 1]$  of it to  
344 the empirically estimated values of  $E$  and  $O$ . As a result, the smoothed fraction becomes  $(\frac{E_{bk} + \alpha E_{bk}}{O_{bk} + \alpha E_{bk}})^\theta$ .

345  **$\theta$  Discounting.** The diversity penalty, weighted by  $\theta$  enforces an even mixing of cells from a batch among all clusters. This  
346 assumption is more likely to break for a batch with few cells. The smaller the batch, the more likely it is, through a sampling  
347 argument, that some cell types are not represented in the batch. Spreading such a batch across all clusters would result in  
348 erroneous clustering. To prevent such a situation, we allot each batch its own  $\theta_b$  term, scaled to the number of cells in the  
349 batch.

$$\theta_b = \theta_{max} [1 - \exp(-\frac{N_b}{K\tau})^2]$$

350 Above,  $\theta_{max}$  is the non-discounted  $\theta$  value, for a large enough batch. The multiplicative factor  $[1 - \exp(-\frac{N}{K\tau})^2]$  ranges  
351 from 0 to 1. This factor scales exponentially for small values of batch size  $N_b$  and plateaus for sufficiently large  $N_b$ . The  
352 hyperparameter  $\tau$  can be interpreted as the minimum number of cells that should be assigned to each cluster from a single  
353 batch. By default, we use values between  $\tau = 5$  and  $\tau = 20$ .

354 **Linear Mixture Model Correction**

355 In this section, we refer to all effects to be integrated out of the original embedding as batch effects. This does not imply  
356 that these effects are purely technical. This terminology is only meant for convenience. After clustering, we estimate and  
357 correct for additive batch effect in low dimensional space. The intuition behind our approach is to give each cell within a  
358 batch a different batch effect term, depending on its cell type/state. As we do not know the latter a priori, we use cluster  
359 membership as a surrogate variable. For simplicity, we choose to limit our treatment of batch effect to the additive mode and  
360 avoid estimating scaling effects. Note that although there are potentially multiple batch assignments handled in the clustering  
361 above, the regression step currently deals with only one variable. Here, we assume that  $\phi$  is  $\phi^{(1)}$ .

362

363 **Simple Additive Batch Model.** Before we jump in to the full mixture model, we review a simpler model of additive batch.  
 364 Here, batch effect is global and is not sensitive to any surrogate variables, such as cluster membership. We assume the data  
 365 is normally distributed and model each sample ( $i$ ) with a multivariate Gaussian.

$$Z_i \sim \mathcal{N}(\mu + \beta\phi_i, \sigma^2 I) \quad (9)$$

366 The covariance matrix  $\Sigma$  is a diagonal matrix with the same variance  $\sigma^2$  for each dimension. The mean is a sum of a  
 367 global intercept vector  $\mu$  and a batch effect vector  $\beta\phi_i$ . In this example,  $\beta \in \mathbb{R}^{d \times B}$  defines an offset vector for each batch.  
 368 We use  $\phi_i$  to index into the appropriate batch of  $\beta$  (i.e.  $\beta\phi_i \in \mathbb{R}^{d \times 1}$ ). In order to regress out the batch effect, we estimate the  
 369 parameters  $\mu$  and  $\beta$  and subtract the batch offsets ( $\beta\phi_i$ ) from the raw data. Since batch effect here is purely additive, we do  
 370 not estimate variance.  $\mu$  is the global mean of the dataset ( $\mu = \sum_{i=1}^N Z_i/N$ ).  $\beta$  terms are estimated by maximizing the log  
 371 likelihood of (9) wrt each  $\beta_b$  term independently.

$$\begin{aligned} \mathcal{LL}(Z) &\propto \sum_{i=1}^N [Z_i - (\mu + \beta\phi_i)]^T \Sigma [Z_i - (\mu + \beta\phi_i)] + \\ &\quad \log |\Sigma| \\ \frac{\delta}{\delta \beta_b} \mathcal{LL}(Z) &\propto \sum_{i \in b} Z_i - (\mu + \beta_b) = 0 \\ \beta_b &= \frac{\sum_{i \in b} Z_i}{N_b} - \mu \end{aligned} \quad (10)$$

372 Thus, the batch offset of batch  $b$  is the mean of cells inside the batch minus the global mean. We subtract this offset from  
 373 the raw data ( $Z$ ) to get the corrected data ( $\hat{Z}$ ).

$$\hat{Z}_i = Z_i - \beta\phi_i \quad (11)$$

374 In the following section, we follow the same approach laid out here to incorporate soft cluster membership into the model.

375

376 **Additive Batch Mixture Model** In order to model the effect of batch, we take advantage of the parameterization of K-means  
 377 as a special case of a Gaussian mixture model (GMM). That is, the cluster assignment probabilities ( $R$ ) computed before now  
 378 become the component mixture weights in the GMM. Like above, this GMM has a homoschedastic, spherical covariance  
 379 matrix ( $\Sigma = \sigma^2 I$ ). Unlike the simpler model, each cluster has its own intercept  $\mu_k$  and set of batch terms  $\beta_{bk}$ .

$$Z_i \sim \sum_k R_{ki} \mathcal{N}(\mu_k + \beta_k \phi_i, \sigma^2 I) \quad (12)$$

380 In this new generative model, each sample is explained as a mixture of Gaussians, with weights  $R_{ki}$ . The cluster specific  
 381 intercepts ( $\mu_k$ ) are the (non-spherical) cluster centroids. We compute the MLE  $\beta$  terms using standard methods for GMMs.  
 382 It is known that the GMM does not have a convex log likelihood, so we use the the expected log likelihood instead. Fixing  
 383  $\mu_k$  and  $R_{ki}$ , we solve for the MLE  $\beta_{bk}$  terms.

$$\begin{aligned} \mathcal{LL}(Z) &\propto \sum_{i=1}^N R_{ki} [\log |\Sigma| + \\ &\quad (Z_i - (\mu_k + \beta_k \phi_i))^T \Sigma (Z_i - (\mu_k + \beta_k \phi_i))] \\ \frac{\delta}{\delta \beta_{bk}} \mathcal{LL}(Z) &\propto \sum_{i \in b} R_{ki} (Z_i - \mu_k + \beta_{bk}) = 0 \\ \beta_{bk} &= \frac{\sum_{i \in b} R_{ki} Z_i}{O_{bk}} - \mu_k \end{aligned} \quad (13)$$

384 Note that (10) and (13) have similar forms. Both compute the expected difference between the batch cells and some  $\mu$ .  
 385 In the simple model,  $\mu$  is a global term, while in the mixture model,  $\mu_k$  is specific to a local cluster  $k$ . In order to correct the  
 386 data in this model, we need a batch offset term for each cell. (12) shows us that this is done by taking expectations over  $\beta_k \phi_i$   
 387 terms:

$$\hat{Z}_i = Z_i - \sum_{k=1}^K R_{ki} \beta_k \phi_i \quad (14)$$

388 **Implementation.** Algorithm 3 lays down the pseudocode for GMM Correct, the mixture model correction procedure derived  
 389 above. For a more vectorized implementation, we rewrite the (13) in terms of each  $\beta_b \in \mathbb{R}^{d \times K}$  matrix and (14) in terms of  
 390 the whole  $Z$  matrix.

$$\beta_b = Z R^T \text{diag}(\mathbf{1} O_b)^{-1} - \mu \quad (15)$$

$$\hat{Z} = Z - \sum_{k=1}^K (\mathbf{1} R_k^T \circ \beta_k \phi) \quad (16)$$

---

**Algorithm 3** GMM Correct

---

```
function CORRECT( $Z, R, \phi$ )
  {Compute Cluster Means}
   $\Gamma \leftarrow \text{diag}(\mathbf{1}^T R)$ 
   $\mu \leftarrow Z R^T \Gamma^{-1} R$ 

  {Compute Batch Offsets}
   $O_{bk} \leftarrow R \phi^T$ 
   $\beta \leftarrow \mathbf{0}_{[d \times K \times B]}$ 
  for  $b \leftarrow 1 \dots B$  do
     $\Gamma_b \leftarrow \text{diag}(\mathbf{1} O_b)$ 
     $\beta_b \leftarrow Z R^T \Gamma_b^{-1} - \mu$ 

  {Compute Batch Corrected Output}
   $\hat{Z} \leftarrow Z - \sum_{k=1}^K (\mathbf{1} R_k^T \circ \beta_k \phi)$ 
  return  $\hat{Z}$ 
```

---

391 **Caveat.** This section assumes the modeled data are orthogonal and each normally distributed. This is not true for the  $\mathcal{L}_2$   
392 normalized data used in spherical clustering. Regression in this space requires the estimation and interpolation of rotation  
393 matrices, a difficult problem. We instead perform batch correction in the unnormalized space. The corrected data  $\hat{Z}$  are then  
394  $\mathcal{L}_2$ -normalized for the next iteration of clustering.

## 395 Performance and Benchmarking

### 396 LISI Metric

397 Assessing the degree of mixing during batch correction and dataset integration is an open problem. Several groups have  
398 proposed methods to quantify the diversity of batches within local neighborhoods, defined by k nearest neighbor (KNN)  
399 graphs, of the embedded space. Buttner et al<sup>27</sup> provide a statistical test to evaluate the degree of mixing, while Azizi et al<sup>28</sup>  
400 report the entropy of these distributions. Our metric for local diversity is related to these approaches, in that we start with a  
401 KNN graph. However, our approach considers two problems that these do not.

402 First, the metric should be more sensitive to local distances. For example, a neighborhood of 100 cells can be equally  
403 mixed among 4 batches. However, within the neighborhood, the cells may be clustered by batch. The second problem is  
404 one of interpretation. kBET provides a statistical test to assess the significance of mixing, but it is not clear whether all  
405 neighborhood should be significantly mixed when the datasets have vastly different cell type proportions. Azizi et al<sup>28</sup> et al  
406 use entropy as a measure of diversity, but it is not clear how to interpret the number of bits required to encode a neighborhood  
407 distribution.

408 Our diversity score, the Local Inverse Simpson's Index (LISI) addresses both points. To be sensitive to local diversity, we  
409 build Gaussian kernel based distributions of neighborhoods. This gives distance-based weights to cells in the neighborhood  
410 and gives less diversity to . The current implementation computes these local distributions using a fixed perplexity (default

30), which has been shown to be a smoother function than fixing the number of neighbors. We address the second issue of interpretation using the Inverse Simpson's Index ( $1/\sum_{b=1}^B p(b)$ ). The probabilities here refer to the batch probabilities in the local neighborhood distributions described above. This index is the expected number of cells needed to sampled before two are drawn from the same batch. If the neighborhood consists of only one batch, then only one draw is needed. If it is an equal mix of two batches, two draws are required on average. Thus, this index gives the effective number of batches in a local neighborhood. Our diversity score, LISI, combines these two features: perplexity based neighborhood construction and the Inverse Simpson's Index. LISI assigns a diversity score to each cell. This score is the effective number of batches in that cell's neighborhood. Code to compute LISI is available as at <https://github.com/immunogenomics/LISI>.

## Time and Memory

We performed execution time and maximum memory usage benchmarks on all analyses. All jobs were run on Linux servers and allotted 6 cores and 120GB of memory. The machines were equipped with Intel Xeon E5-2690 v3 processors. To evaluate execution time and maximal memory usage, we used the Linux time utility (`/usr/bin/time` on our systems) with the `-v` flag to record memory usage. Execution time was recorded from the *Elapsed time* field. Maximum memory usage was recorded from the *Maximum resident set size* field.

## Analysis Details

### Data Availability

All data analyzed in this manuscript is publicly available through online sources. We included links to all data sources in **Table S6**.

### Preprocessing scRNAseq data.

We downloaded raw read or UMI matrices for all datasets, from their respective sources. The one exception was the 3pV1 dataset from the PBMC analysis. These data were originally quantified with the hg19 reference, while the other two PBMC datasets were quantified with GRCh38. Thus, we downloaded the fastq files from the 10X website (**Table S6**). We quantified gene expression counts using Cell Ranger<sup>10,29</sup> v2.1.0 with GRCh38. From the raw count matrices, we used a standard data normalization procedure, laid out below, for all analyses, unless otherwise specified. Except for the  $L_2$  normalization and within-batch variable gene detection, this procedure follows the standard guidelines of the Seurat single cell analysis platform.

We filtered cells with fewer than 500 genes or more than 20% mitochondrial reads. In the pancreas datasets, we filtered cells with the same thresholds used in Butler et al.<sup>6</sup> 1750 genes for CelSeq, 2500 genes for CelSeq2, no filter for Fluidigm C1, 2500 genes for SmartSeq2, and 500 genes for inDrop. We then library normalizes each cell to 10,000 reads, by multiplicative

440 scaling, then log scaled the normalized data. We then identified the top 1000 variable genes, ranked by coefficient of  
441 variation, within in each dataset. We pooled these genes to form the variable gene set of the analysis. Using only the variable  
442 genes, we mean centered and variance 1 scaled the genes across the cells. Note that this was done in the aggregate matrix,  
443 with all cells, rather than within each dataset separately. We then  $L_2$  normalized the cell expression vectors, so that squared  
444 cosine distance can be computed as the squared Euclidean distance. With these values, performed truncated SVD keeping  
445 the top 30 eigenvectors. Finally, we multiplied the cell embeddings by the eigenvalues to avoid giving eigenvectors equal  
446 variance.

## 447 **Visualization**

448 We used the UMAP algorithm<sup>30</sup> to visualize cells in a two dimensional space. For all analyses, UMAP was run with the  
449 following parameters:  $k = 30$  nearest neighbors, correlation based distance, and  $min\_dist = 0.1$ .

## 450 **Comparison to other algorithms.**

451 We used the provided packages or source code provided by the four comparison algorithm publications. For MNN Correct,  
452 we used the `mnnCorrect` function, with default parameters, in the `scrn` R package,<sup>31</sup> version 1.9.4. For Seurat MultiCCA,  
453 we followed the suggested integration pipeline in the Seurat R package,<sup>32</sup> version 2.3.4. Specifically, this included the  
454 `RunMultiCCA`, `MetageneBicorPlot`, `CalcVarExpRatio`, `SubsetData` (based on the `var.ratio.pca` statistic), and `AlignSubspace`  
455 functions. We used all default parameters. We chose the number of canonical components to match the number of principal  
456 components used in the preprocessing. Unlike the integration examples, we did not scale data within datasets separately,  
457 unless otherwise specified. We scaled data on the pooled count matrix instead. For Scanorama, we used the `assemble`  
458 function, with precomputed PCs, from the primary github repository (brianhie/scanorama). We set `knn=30` and `sigma=1`, to  
459 match the default comparable MNN Correct parameters. All other parameters were kept at default values. We did not use  
460 the `correct` function, as this included both pre-processing and integration of the data. For more equitable comparisons, we  
461 tried to use the same pre-processing pipelines for all methods and only compare only the integration steps. For BBKNN, we  
462 downloaded software from the primary github repository (Teichlab/bbknn) and followed the suggested integration pipelines,  
463 using the `bbknn` and `scanny` `umap` functions. For the `bbknn` function, we used `k=5` and `trim=20` for all analyses except for  
464 the HCA datasets, in which we used `k=10` and `trim=30`, to accommodate the larger number of cells. All other parameters  
465 were kept at default values.

## 466 **Harmony Parameters**

467 By default, we set the following parameters for Harmony:  $\theta = 2$ ,  $K = 100$ ,  $\tau = 0$ ,  $\alpha = 0.1$ ,  $\sigma = 0.1$ , `block_size= 0.05`,  
468  $\epsilon_{cluster} = 10^{-5}$ ,  $\epsilon_{harmony} = 10^{-4}$ , `max_itercluster = 200`, `max_iterHarmony = 10`. For the pancreas analysis, we set  $\tau = 5$ .  
469 We set donors to be the primary covariate ( $\theta = 2$ ) and technology secondary ( $\theta = 4$ ).



## 470 **Identification of alpha and beta ER stress subpopulations.**

471 We identified the alpha and beta ER stress clusters in **Figure 5** by performing downstream analysis, specified in this section,  
472 on the integrated joint embedding produced by Harmony. After Harmony integration, we performed clustering analysis to  
473 find novel subtypes. Clustering was done on the trimmed shared nearest neighbor graph with the Louvain algorithm,<sup>33</sup> as  
474 implemented in the Seurat package BuildSNN and RunModularityClustering functions. We used parameters resolution=0.8,  
475 k=30, and nn.eps=0. We identified several clusters within the alpha, beta, and ductal cell populations. For each cluster, we  
476 performed differential expression analysis within the defined cell type. That is, we compared alpha clusters to all other alpha  
477 cells. For differential expression, we used the R Limma package<sup>34</sup> on the normalized data. We included technology and  
478 library complexity (log number of unique genes) as covariates in the linear models. We used the top 100 over-expressed  
479 genes for each cluster, weighted by the t-statistic, to perform pathway enrichment with the enrichR<sup>35,36</sup> R package, using  
480 the three Gene Ontology genesets.<sup>37,38</sup> The ductal subpopulation was enriched for ribosomal genes; we did not follow up  
481 on this cluster. The results for the differential expression and enrichment analyses for the two ER stress subpopulations is  
482 available in Tables S7 through S10.

## 483 **Labeling cells with canonical markers.**

484 In the cell-line, PBMC, and Pancreas analyses, we labeled cells within individual datasets using canonical markers. We did  
485 this by using the standard pre-processing pipeline for each dataset, clustering (Louvain, as above), and identifying clusters  
486 specific for the canonical markers for that analysis. We used a similar strategy to identify fine-grained subpopulations of  
487 PBMCs and in the HCA 500,000 cell dataset. In these case, we clustered in the joint embedding produced by Harmony, then  
488 looked for clusters that specifically expressed expected canonical markers.

## 489 **Acknowledgements**

490 This work was supported in part by funding from the National Institutes of Health (UH2AR067677, U19AI111224, and  
491 1R01AR063759 (to S.R.)) and T32 AR007530-31. We thank members of the Raychaudhuri and Brenner labs for comments  
492 and discussion.

## 493 **Author Contributions**

494 SR and IK conceived the research. IK led computational work under the guidance of SR, assisted by PL, JF, and KS. All  
495 authors participated in interpretation and writing the manuscript.

## 496 **Competing Interests Statement**

497 IK does paid bioinformatics consulting through Brilyant LLC.

## 498 **References**

- 499 <sup>1</sup> Svensson, V., Vento-Tormo, R. & Teichmann, S. A. Exponential scaling of single-cell RNA-seq in the past decade. *Nat.*  
500 *Protoc.* **13**, 599–604 (2018).
- 501 <sup>2</sup> Regev, A. *et al.* The human cell atlas. *Elife* **6** (2017).
- 502 <sup>3</sup> Zhang, F. *et al.* Defining inflammatory cell states in rheumatoid arthritis joint synovial tissues by integrating single-cell  
503 transcriptomics and mass cytometry. *bioRxiv* (2018).
- 504 <sup>4</sup> Arazi, A. *et al.* The immune cell landscape in kidneys of lupus nephritis patients (2018).
- 505 <sup>5</sup> Hicks, S. C., Townes, F. W., Teng, M. & Irizarry, R. A. Missing data and technical variability in single-cell RNA-  
506 sequencing experiments. *Biostatistics* (2017).
- 507 <sup>6</sup> Butler, A., Hoffman, P., Smibert, P., Papalexi, E. & Satija, R. Integrating single-cell transcriptomic data across different  
508 conditions, technologies, and species. *Nat. Biotechnol.* **36**, 411–420 (2018).
- 509 <sup>7</sup> Haghverdi, L., Lun, A. T. L., Morgan, M. D. & Marioni, J. C. Batch effects in single-cell RNA-sequencing data are  
510 corrected by matching mutual nearest neighbors. *Nat. Biotechnol.* **36**, 421–427 (2018).
- 511 <sup>8</sup> Hie, B. L., Bryson, B. & Berger, B. Panoramic stitching of heterogeneous single-cell transcriptomic data (2018).
- 512 <sup>9</sup> Park, J.-E., Polanski, K., Meyer, K. & Teichmann, S. A. Fast batch alignment of single cell transcriptomes unifies multiple  
513 mouse cell atlases into an integrated landscape (2018).
- 514 <sup>10</sup> Zheng, G. X. Y. *et al.* Massively parallel digital transcriptional profiling of single cells. *Nat. Commun.* **8**, 14049 (2017).
- 515 <sup>11</sup> Li, B. *et al.* HCA data portal - census of immune cells.
- 516 <sup>12</sup> Segerstolpe, Å. *et al.* Single-Cell transcriptome profiling of human pancreatic islets in health and type 2 diabetes. *Cell*  
517 *Metab.* **24**, 593–607 (2016).
- 518 <sup>13</sup> Baron, M. *et al.* A Single-Cell transcriptomic map of the human and mouse pancreas reveals inter- and intra-cell population  
519 structure. *Cell Syst* **3**, 346–360.e4 (2016).
- 520 <sup>14</sup> Lawlor, N. *et al.* Single-cell transcriptomes identify human islet cell signatures and reveal cell-type-specific expression  
521 changes in type 2 diabetes. *Genome Res.* **27**, 208–222 (2017).

- 522 <sup>15</sup> Grün, D. *et al.* De novo prediction of stem cell identity using Single-Cell transcriptome data. *Cell Stem Cell* **19**, 266–277  
523 (2016).
- 524 <sup>16</sup> Muraro, M. J. *et al.* A Single-Cell transcriptome atlas of the human pancreas. *Cell Syst* **3**, 385–394.e3 (2016).
- 525 <sup>17</sup> Gao, T. *et al.* Pdx1 maintains  $\beta$  cell identity and function by repressing an  $\alpha$  cell program. *Cell Metab.* **19**, 259–271  
526 (2014).
- 527 <sup>18</sup> Jia, S. *et al.* Insm1 cooperates with neurod1 and foxa2 to maintain mature pancreatic  $\beta$ -cell function. *EMBO J.* **34**,  
528 1417–1433 (2015).
- 529 <sup>19</sup> Sachdeva, M. M. *et al.* Pdx1 (MODY4) regulates pancreatic beta cell susceptibility to ER stress. *Proc. Natl. Acad. Sci. U.*  
530 *S. A.* **106**, 19090–19095 (2009).
- 531 <sup>20</sup> Katoh, M. C. *et al.* MafB is critical for glucagon production and secretion in mouse pancreatic  $\alpha$  cells in vivo. *Mol. Cell.*  
532 *Biol.* **38** (2018).
- 533 <sup>21</sup> Liu, J. *et al.* Islet-1 regulates arx transcription during pancreatic islet  $\alpha$ -Cell development. *J. Biol. Chem.* **286**, 15352–  
534 15360 (2011).
- 535 <sup>22</sup> Akiyama, M. *et al.* X-box binding protein 1 is essential for insulin regulation of pancreatic  $\alpha$ -cell function. *Diabetes* **62**,  
536 2439–2449 (2013).
- 537 <sup>23</sup> Burcelin, R., Knauf, C. & Cani, P. D. Pancreatic alpha-cell dysfunction in diabetes. *Diabetes Metab.* **34 Suppl 2**, S49–55  
538 (2008).
- 539 <sup>24</sup> Mao, Q., Wang, L., Goodison, S. & Sun, Y. Dimensionality reduction via graph structure learning. In *Proceedings of*  
540 *the 21th ACM SIGKDD International Conference on Knowledge Discovery and Data Mining, KDD '15*, 765–774 (ACM,  
541 New York, NY, USA, 2015).
- 542 <sup>25</sup> Haghverdi, L., Lun, A. T. L., Morgan, M. D. & Marioni, J. C. Batch effects in single-cell RNA-sequencing data are  
543 corrected by matching mutual nearest neighbors. *Nat. Biotechnol.* **36**, 421–427 (2018).
- 544 <sup>26</sup> Dhillon, I. S. & Modha, D. S. Concept decompositions for large sparse text data using clustering. *Mach. Learn.* **42**,  
545 143–175 (2001).
- 546 <sup>27</sup> Buttner, M., Miao, Z., Wolf, A., Teichmann, S. A. & Theis, F. J. Assessment of batch-correction methods for scRNA-seq  
547 data with a new test metric (2017).
- 548 <sup>28</sup> Azizi, E. *et al.* Single-Cell map of diverse immune phenotypes in the breast tumor microenvironment. *Cell* **174**, 1293–  
549 1308.e36 (2018).

- 550 <sup>29</sup> Dobin, A. *et al.* STAR: ultrafast universal RNA-seq aligner. *Bioinformatics* **29**, 15–21 (2013).
- 551 <sup>30</sup> McInnes, L. & Healy, J. UMAP: Uniform manifold approximation and projection for dimension reduction. *arXiv* (2018).  
552 1802.03426.
- 553 <sup>31</sup> Lun, A. T. L., McCarthy, D. J. & Marioni, J. C. A step-by-step workflow for low-level analysis of single-cell rna-seq data  
554 with bioconductor. *F1000Res.* **5**, 2122 (2016).
- 555 <sup>32</sup> Butler, A., Hoffman, P., Smibert, P., Papalexi, E. & Satija, R. Integrating single-cell transcriptomic data across different  
556 conditions, technologies, and species. *Nat. Biotechnol.* (2018). URL [https://www.nature.com/articles/  
557 nbt.4096](https://www.nature.com/articles/nbt.4096).
- 558 <sup>33</sup> Blondel, V. D., Guillaume, J.-L., Lambiotte, R. & Lefebvre, E. Fast unfolding of communities in large networks. *J. Stat.*  
559 *Mech: Theory Exp.* **2008** (2008).
- 560 <sup>34</sup> Ritchie, M. E. *et al.* limma powers differential expression analyses for RNA-sequencing and microarray studies. *Nucleic*  
561 *Acids Research* **43**, e47 (2015).
- 562 <sup>35</sup> Chen, E. Y. *et al.* Enrichr: interactive and collaborative HTML5 gene list enrichment analysis tool. *BMC Bioinformatics*  
563 **14**, 128 (2013).
- 564 <sup>36</sup> Kuleshov, M. V. *et al.* Enrichr: a comprehensive gene set enrichment analysis web server 2016 update. *Nucleic Acids Res.*  
565 **44**, W90–7 (2016).
- 566 <sup>37</sup> The Gene Ontology Consortium. Expansion of the gene ontology knowledgebase and resources. *Nucleic Acids Res.* **45**,  
567 D331–D338 (2017).
- 568 <sup>38</sup> Ashburner, M. *et al.* Gene ontology: tool for the unification of biology. the gene ontology consortium. *Nat. Genet.* **25**,  
569 25–29 (2000).
